# Supplementary material for: The impact of pyrethroid resistance on the efficacy and effectiveness of bednets for malaria control in Africa
Source: eLife journal article supplement (doi:10.7554/elife.16090), 2016-08-22
Supplement: supp [file elife-16090-supp-v1.zip]

Archive with 15 entries (15 files):
- elife_poa_e16090_Source_Code.docx
- elife_poa_e16090_Figure_3_figure_supplement_1.pdf
- elife_poa_e16090_Figure_4_figure_supplement_2.tif
- elife_poa_e16090_Figure_4_figure_supplement_5.pdf
- elife_poa_e16090_Figure_2_source_data_1.docx
- elife_poa_e16090_Figure_1_figure_supplement_2.tif
- elife_poa_e16090_Figure_1_figure_supplement_1.tif
- elife_poa_e16090_Figure_4_figure_supplement_1.tif
- elife_poa_e16090_Figure_5_figure_supplement_2.tif
- elife_poa_e16090_Figure_4_figure_supplement_3.tif
- elife_poa_e16090_Figure_5_figure_supplement_3.tif
- elife_poa_e16090_Figure_2_source_data_2.xlsx
- elife_poa_e16090_Figure_2_source_data_3.xlsx
- elife_poa_e16090_Figure_5_figure_supplement_1.tif
- elife_poa_e16090_Figure_4_figure_supplement_4.tif
