# Supplementary material for: The impact of pyrethroid resistance on the efficacy and effectiveness of bednets for malaria control in Africa
Source: eLife journal article supplement (doi:10.7554/elife.16090), 2016-08-22
Supplement: supp [file elife-16090-supp-v1.zip › elife_poa_e16090_Figure_2_source_data_2.xlsx]

## Sheet: SourceData1
ID	Paper_Reference	Country	Net_Tested_In_Hut_Trial	Total_Collected_In_Hut_Trial	Total_Dead_In_Hut_Trial	Insecticide_In_Bioassay	Concentration_In_Bioassay	Mosquito_Species	Total_Tested_In_Bioassay	Total_Dead_In_Bioassay
1	12	Côte_d'Ivoire	PermaNet_2.0	108	68	Deltamethrin	0.05	An_gambiae_sl	99	43
2	14	Tanzania	Olyset_Net	288	90	Permethrin	2%_w/w	An_gambiae_sl	100	17
3	15	Ethiopia	PermaNet_2.0	426	247	Deltamethrin	0.05	An_gambiae_sl	80	15
4	16	Burkina_Faso	Permanet_2.0	42	25	Deltamethrin	0.05	An_gambiae_sl	100	2
5	16	Burkina_Faso	PermaNet_2.0	72	32	Deltamethrin	0.05	An_gambiae_sl	100	2
6	17	Côte_d'Ivoire	Permanet_2.0	317	110	Deltamethrin	0.05	An_gambiae_sl	100	11
7	18	Benin	PermaNet_2.0	243	216	Deltamethrin	0.05	An_gambiae_sl	100	85
8	18	Cameroon	PermaNet_2.0	105	87	Deltamethrin	0.05	An_gambiae_sl	100	70
9	18	Burkina_Faso	PermaNet_2.0	329	146	Deltamethrin	0.05	An_gambiae_sl	100	23
10	19	Tanzania	Permanet_2.0	574	548	Deltamethrin	0.05	An_gambiae_sl	100	100
11	20	Tanzania	Olyset_Net	177	111	Permethrin	0.75	An_gambiae_sl	164	164
12	21	Nigeria	Olyset_Net	368	144	Permethrin	0.75	An_gambiae_sl	140	106
13	30	Burkina_Faso	Olyset_Net	923	179	Permethrin	0.75	An_gambiae_sl	101	14
14	30	Burkina_Faso	PermaNet_2.0	858	165	Deltamethrin	0.05	An_gambiae_sl	85	28
15	30	Burkina_Faso	Olyset_Net	1458	454	Permethrin	0.75	An_gambiae_sl	153	8
16	30	Burkina_Faso	PermaNet_2.0	1075	384	Deltamethrin	0.05	An_gambiae_sl	163	4
17	22	Benin	Permanet_2.0	63	28	Deltamethrin	0.05	An_gambiae_sl	61	43
18	22	Benin	Permanet_2.0	676	304	Deltamethrin	0.05	An_gambiae_sl	97	23
19	23	Tanzania	Interceptor	134	124	Alphacypermethrin	0.05	An_gambiae_sl	351	351
20	23	Tanzania	Interceptor	68	56	Alphacypermethrin	0.05	An_funestus	401	401
