# Supplementary material for: The impact of pyrethroid resistance on the efficacy and effectiveness of bednets for malaria control in Africa
Source: eLife journal article supplement (doi:10.7554/elife.16090), 2016-08-22
Supplement: supp [file elife-16090-supp-v1.zip › elife_poa_e16090_Figure_2_source_data_3.xlsx]

## Sheet: SourceData2
No	Study_Number	Paper_reference	Country	Assay	Mosquito_Species	Control	Insecticide	Concentration	Exposure	PBO_Mortality_(%)	Number_Mosquitoes_PBO_Group	Control_Mortality_(%)	Number_Mosquitoes_Control_Group
1	1	54	Tanzania	CDC_Bottle_Assay	An_gambiae_sl	Acetone	Permethrin	NA	Sequential	93.5	108	17.8	107
2	1	54	Tanzania	CDC_Bottle_Assay	An_gambiae_ss	Acetone	Permethrin	NA	Sequential	100	107	100	118
3	2	37	Uganda	WHO_Bioassays	An_funestus	No_PBO	Permethrin	0.0075	Sequential	92	50	49	93
4	2	37	Uganda	WHO_Bioassays	An_funestus	No_PBO	Permethrin	0.0075	Sequential	92	50	6	98
5	2	37	Uganda	WHO_Bioassays	An_funestus	No_PBO	Permethrin	0.0075	Sequential	88	50	51	80
6	2	37	Uganda	WHO_Bioassays	An_funestus	No_PBO	Permethrin	0.0075	Sequential	94	48	33	96
7	2	37	Kenya	WHO_Bioassays	An_funestus	No_PBO	Permethrin	0.0075	Sequential	96	50	20	92
8	2	37	Uganda	WHO_Bioassays	An_funestus	No_PBO	Permethrin	0.0075	Sequential	98	50	66	93
9	2	37	Uganda	WHO_Bioassays	An_funestus	No_PBO	Permethrin	0.0075	Sequential	96	50	33	97
10	2	37	Uganda	WHO_Bioassays	An_funestus	No_PBO	Permethrin	0.0075	Sequential	86	50	66	79
11	2	37	Uganda	WHO_Bioassays	An_funestus	No_PBO	Permethrin	0.0075	Sequential	98	50	62	92
12	2	37	Uganda	WHO_Bioassays	An_funestus	No_PBO	Deltamethrin	0.0005	Sequential	94	50	29	98
13	2	37	Uganda	WHO_Bioassays	An_funestus	No_PBO	Deltamethrin	0.0005	Sequential	90	50	4	75
14	2	37	Uganda	WHO_Bioassays	An_funestus	No_PBO	Deltamethrin	0.0005	Sequential	100	50	65	91
15	2	37	Uganda	WHO_Bioassays	An_funestus	No_PBO	Deltamethrin	0.0005	Sequential	98	50	7	80
16	2	37	Uganda	WHO_Bioassays	An_funestus	No_PBO	Etofenprox	0.0005	Sequential	88	50	66	73
17	2	37	Uganda	WHO_Bioassays	An_funestus	No_PBO	Etofenprox	0.0005	Sequential	100	50	76	77
18	3	55	Zimbabwe	WHO_Bioassays	An_funestus	No_PBO	Deltamethrin	0.0005	Sequential	100	97	44.5	50
19	3	55	Zambia	WHO_Bioassays	An_funestus	No_PBO	Deltamethrin	0.0005	Sequential	100	84	19.2	26
20	3	55	Zambia	WHO_Bioassays	An_funestus	No_PBO	Deltamethrin	0.0005	Sequential	100	67	29.6	54
21	4	56	Côte_d'Ivoire	WHO_Bioassays	An_gambiae_ss	No_PBO	Permethrin	0.0075	Sequential	73	100	26.3	99
22	4	56	Côte_d'Ivoire	WHO_Bioassays	An_gambiae_ss	No_PBO	Deltamethrin	0.0005	Sequential	76	100	36	100
23	4	56	Côte_d'Ivoire	WHO_Bioassays	An_gambiae_ss	No_PBO	Permethrin	0.0075	Sequential	74	100	23	100
24	4	56	Côte_d'Ivoire	WHO_Bioassays	An_gambiae_ss	No_PBO	Deltamethrin	0.0005	Sequential	79	100	31	100
25	5	57	Zanzibar	WHO_Bioassays	An_gambiae_sl	No_PBO	Lambdacyhalothrin	0.0005	Sequential	100	79	67	106
26	5	57	Zanzibar	WHO_Bioassays	An_gambiae_sl	No_PBO	Lambdacyhalothrin	0.0005	Sequential	96.9	64	45.7	105
27	5	57	Zanzibar	WHO_Bioassays	An_gambiae_sl	No_PBO	Lambdacyhalothrin	0.0005	Sequential	100	48	18.3	93
28	5	57	Zanzibar	WHO_Bioassays	An_gambiae_sl	No_PBO	Lambdacyhalothrin	0.0005	Sequential	100	23	82.4	68
29	6	58	Côte_d'Ivoire	WHO_Bioassays	An_gambiae_sl	No_PBO	Deltamethrin	0.0005	Sequential	93	87	64	87
30	7	59	Côte_d'Ivoire	WHO_Bioassays	An_gambiae_ss	No_PBO	Permethrin	0.0075	Sequential	100	100	51.2	201
31	7	59	Côte_d'Ivoire	WHO_Bioassays	An_gambiae_ss	No_PBO	alpha_cypermethrin	0.0005	Sequential	100	106	67.9	240
32	7	59	Côte_d'Ivoire	WHO_Bioassays	An_gambiae_ss	No_PBO	Deltamethrin	0.0005	Sequential	100	103	75.8	264
33	7	59	Côte_d'Ivoire	WHO_Bioassays	An_gambiae_ss	No_PBO	Etofenprox	0.0005	Sequential	58.2	91	34	200
34	8	60	Chad	WHO_Bioassays	An_arabiensis	No_PBO	Permethrin	0.0075	Sequential	100	80	54.1	81
35	9	61	other	WHO_Bioassays	An_gambiae_ss	No_PBO	Deltamethrin	NA	NA	57.3	124	12.3	114
36	10	62	Uganda	WHO_Bioassays	An_gambiae_ss	No_PBO	Deltamethrin	0.0005	Sequential	93.8	16	33	94
37	10	62	Uganda	WHO_Bioassays	An_gambiae_ss	No_PBO	Permethrin	0.0075	Sequential	88.9	18	24.7	166
38	10	62	Uganda	WHO_Bioassays	An_gambiae_ss	No_PBO	Deltamethrin	0.0005	Sequential	100	11	49.3	67
39	10	62	Uganda	WHO_Bioassays	An_gambiae_ss	No_PBO	Permethrin	0.0075	Sequential	84.2	19	15.5	116
40	10	62	Uganda	WHO_Bioassays	An_arabiensis	No_PBO	Deltamethrin	0.0005	Sequential	98.4	61	84.6	208
41	10	62	Uganda	WHO_Bioassays	An_arabiensis	No_PBO	Permethrin	0.0075	Sequential	100	51	56.9	325
42	10	62	Uganda	WHO_Bioassays	An_arabiensis	No_PBO	Deltamethrin	0.0005	Sequential	100	39	97.5	161
43	10	62	Uganda	WHO_Bioassays	An_arabiensis	No_PBO	Permethrin	0.0075	Sequential	100	59	67.1	365
44	11	65	Sudan	WHO_Bioassays	An_arabiensis	No_PBO	Deltamethrin	0.0005	Sequential	83.8	126	25.3	89
45	11	65	Sudan	WHO_Bioassays	An_arabiensis	No_PBO	Permethrin	0.0075	Sequential	0	75	1.3	72
46	11	65	South_Africa	WHO_Bioassays	An_arabiensis	No_PBO	Deltamethrin	0.0005	Sequential	70.3	78	2.2	97
47	11	65	South_Africa	WHO_Bioassays	An_arabiensis	No_PBO	Permethrin	0.0075	Sequential	1.3	74	6.7	73
48	13	66	other	WHO_Cone_Assay	An_gambiae_ss	No_PBO	Deltamethrin	25_mg/m2	Simultaneous	58.2	160	7.5	160
49	14	67	Mozambique	WHO_Bioassays	An_funestus	No_PBO	Deltamethrin	0.0005	Sequential	92.6	27	50	42
50	15	68	Nigeria	WHO_Bioassays	An_gambiae_ss	No_PBO	Permethrin	0.0075	Sequential	87	200	58	200
51	15	68	Nigeria	WHO_Bioassays	An_gambiae_ss	No_PBO	Deltamethrin	0.0005	Sequential	92	200	72	200
52	17	69	Mozambique	WHO_Bioassays	An_funestus	No_PBO	lambdacyhalothrin	0.0005	Sequential	97	36	55	40
53	17	69	Mozambique	WHO_Bioassays	An_funestus	No_PBO	lambdacyhalothrin	0.0005	Sequential	98	44	48	48
54	17	69	Mozambique	WHO_Bioassays	An_funestus	No_PBO	lambdacyhalothrin	0.0005	Sequential	100	9	25	4
55	17	69	Mozambique	WHO_Bioassays	An_funestus	No_PBO	lambdacyhalothrin	0.0005	Sequential	100	10	57	14
56	19	80	Burkina_Faso	WHO_Bioassays	An_gambiae_sl	No_PBO	Deltamethrin	NA	Sequential	100	107	79	104
57	19	80	Burkina_Faso	WHO_Bioassays	An_gambiae_sl	No_PBO	Deltamethrin	NA	Sequential	100	104	73	109
58	19	80	Burkina_Faso	WHO_Bioassays	An_gambiae_sl	No_PBO	Permethrin	NA	Sequential	98	105	67	106
59	19	80	Burkina_Faso	WHO_Bioassays	An_gambiae_sl	No_PBO	Permethrin	NA	Sequential	92	104	66	108
60	19	80	Burkina_Faso	WHO_Bioassays	An_gambiae_sl	No_PBO	Permethrin	NA	Sequential	94	104	58	103
61	19	80	Burkina_Faso	WHO_Bioassays	An_gambiae_sl	No_PBO	Permethrin	NA	Sequential	100	103	56	107
62	20	81	other	WHO_Bioassays	An_arabiensis	No_PBO	Permethrin	NA	Sequential	100	25	82	56
63	20	81	other	WHO_Bioassays	An_arabiensis	No_PBO	Deltamethrin	NA	Sequential	100	25	96	25
64	20	81	other	WHO_Bioassays	An_arabiensis	No_PBO	Permethrin	NA	Sequential	100	25	17	12
65	21	82	other	WHO_Bioassays	An_gambiae_ss	No_PBO	Deltamethrin	NA	Sequential	98.59	71	62.5	64
66	21	82	other	WHO_Bioassays	An_gambiae_ss	No_PBO	Permethrin	NA	Sequential	31.11	45	4.08	49
67	21	82	other	WHO_Bioassays	An_gambiae_ss	No_PBO	Deltamethrin	NA	Sequential	75.76	33	23.68	38
68	21	82	other	WHO_Bioassays	An_gambiae_ss	No_PBO	Permethrin	NA	Sequential	21.28	47	5.99	51
69	22	83	Benin	WHO_Bioassays	An_gambiae_sl	No_PBO	Permethrin	0.75	Sequential	43	100	82.57	98
70	22	83	Benin	WHO_Bioassays	An_gambiae_sl	No_PBO	Permethrin	0.0075	Sequential	96	99	85.25	95
71	22	83	Benin	WHO_Bioassays	An_gambiae_sl	No_PBO	Deltamethrin	0.0005	Sequential	98.96	95	68.76	91
72	24	PMI (2014). Personal Communication	Mali	CDC_Bottle_Assay	An_gambiae_sl	Acetone	Permethrin	21.5µg/ml	Sequential	10	97	3	101
73	24	PMI (2014). Personal Communication	Mali	CDC_Bottle_Assay	An_gambiae_sl	Acetone	Permethrin	21.5µg/ml	Sequential	11	100	3	104
74	24	PMI (2014). Personal Communication	Mali	CDC_Bottle_Assay	An_gambiae_sl	Acetone	Permethrin	21.5µg/ml	Sequential	26	70	5	100
75	24	PMI (2014). Personal Communication	Mali	CDC_Bottle_Assay	An_gambiae_sl	Acetone	Permethrin	21.5µg/ml	Sequential	15	99	0	100
76	24	PMI (2014). Personal Communication	Mali	CDC_Bottle_Assay	An_gambiae_sl	Acetone	Permethrin	21.5µg/ml	Sequential	7	102	0	104
77	24	PMI (2014). Personal Communication	Mali	CDC_Bottle_Assay	An_gambiae_sl	Acetone	Permethrin	21.5µg/ml	Sequential	77	98	19	104
78	24	PMI (2014). Personal Communication	Mali	CDC_Bottle_Assay	An_gambiae_sl	Acetone	Permethrin	21.5µg/ml	Sequential	43	103	1	103
79	24	PMI (2014). Personal Communication	Mali	CDC_Bottle_Assay	An_gambiae_sl	Acetone	Permethrin	21.5µg/ml	Sequential	75	100	4	103
80	24	PMI (2014). Personal Communication	Mali	CDC_Bottle_Assay	An_gambiae_sl	Acetone	Permethrin	21.5µg/ml	Sequential	49	45	1	100
81	24	PMI (2014). Personal Communication	Mali	CDC_Bottle_Assay	An_gambiae_sl	Acetone	Permethrin	21.5µg/ml	Sequential	10	100	17	99
82	24	PMI (2014). Personal Communication	Mali	CDC_Bottle_Assay	An_gambiae_sl	Acetone	Deltamethrin	12.51.5µg/ml	Sequential	18	69	0	103
83	24	PMI (2014). Personal Communication	Mali	CDC_Bottle_Assay	An_gambiae_sl	Acetone	Deltamethrin	12.51.5µg/ml	Sequential	47	104	34	100
84	24	PMI (2014). Personal Communication	Mali	CDC_Bottle_Assay	An_gambiae_sl	Acetone	Deltamethrin	12.51.5µg/ml	Sequential	9	99	0	104
85	24	PMI (2014). Personal Communication	Mali	CDC_Bottle_Assay	An_gambiae_sl	Acetone	Deltamethrin	12.51.5µg/ml	Sequential	7	46	2	104
86	24	PMI (2014). Personal Communication	Mali	CDC_Bottle_Assay	An_gambiae_sl	Acetone	Deltamethrin	12.51.5µg/ml	Sequential	92	103	88	101
87	24	PMI (2014). Personal Communication	Mali	CDC_Bottle_Assay	An_gambiae_sl	Acetone	Deltamethrin	12.51.5µg/ml	Sequential	24	101	4	100
88	24	PMI (2014). Personal Communication	Mali	CDC_Bottle_Assay	An_gambiae_sl	Acetone	Deltamethrin	12.51.5µg/ml	Sequential	85	97	42	90
89	24	PMI (2014). Personal Communication	Mali	CDC_Bottle_Assay	An_gambiae_sl	Acetone	Deltamethrin	12.51.5µg/ml	Sequential	78	23	24	98
90	24	PMI (2014). Personal Communication	Mali	CDC_Bottle_Assay	An_gambiae_sl	Acetone	Permethrin	21.5µg/ml	Sequential	10	78	3	102
91	24	PMI (2014). Personal Communication	Mali	CDC_Bottle_Assay	An_gambiae_sl	Acetone	Permethrin	21.5µg/ml	Sequential	4	101	1	102
92	24	PMI (2014). Personal Communication	Mali	CDC_Bottle_Assay	An_gambiae_sl	Acetone	Permethrin	21.5µg/ml	Sequential	4	102	7	104
93	24	PMI (2014). Personal Communication	Mali	CDC_Bottle_Assay	An_gambiae_sl	Acetone	Permethrin	21.5µg/ml	Sequential	45	104	38	100
94	24	PMI (2014). Personal Communication	Mali	CDC_Bottle_Assay	An_gambiae_sl	Acetone	Permethrin	21.5µg/ml	Sequential	3	101	10	103
95	24	PMI (2014). Personal Communication	Mali	CDC_Bottle_Assay	An_gambiae_sl	Acetone	Permethrin	21.5µg/ml	Sequential	10	103	17	103
96	24	PMI (2014). Personal Communication	Mali	CDC_Bottle_Assay	An_gambiae_sl	Acetone	Permethrin	21.5µg/ml	Sequential	46	98	51	100
97	24	PMI (2014). Personal Communication	Mali	CDC_Bottle_Assay	An_gambiae_sl	Acetone	Permethrin	21.5µg/ml	Sequential	6	102	2	103
98	24	PMI (2014). Personal Communication	Mali	CDC_Bottle_Assay	An_gambiae_sl	Acetone	Permethrin	21.5µg/ml	Sequential	8	104	2	104
99	24	PMI (2014). Personal Communication	Mali	CDC_Bottle_Assay	An_gambiae_sl	Acetone	Deltamethrin	12.51.5µg/ml	Sequential	71	102	50	101
100	24	PMI (2014). Personal Communication	Mali	CDC_Bottle_Assay	An_gambiae_sl	Acetone	Deltamethrin	12.51.5µg/ml	Sequential	75	100	56	102
101	24	PMI (2014). Personal Communication	Mali	CDC_Bottle_Assay	An_gambiae_sl	Acetone	Deltamethrin	12.51.5µg/ml	Sequential	81	101	13	104
102	24	PMI (2014). Personal Communication	Mali	CDC_Bottle_Assay	An_gambiae_sl	Acetone	Deltamethrin	12.51.5µg/ml	Sequential	88	100	50	101
103	24	PMI (2014). Personal Communication	Mali	CDC_Bottle_Assay	An_gambiae_sl	Acetone	Deltamethrin	12.51.5µg/ml	Sequential	66	102	47	100
104	24	PMI (2014). Personal Communication	Mali	CDC_Bottle_Assay	An_gambiae_sl	Acetone	Deltamethrin	12.51.5µg/ml	Sequential	76	103	57	102
105	24	PMI (2014). Personal Communication	Mali	CDC_Bottle_Assay	An_gambiae_sl	Acetone	Deltamethrin	12.51.5µg/ml	Sequential	10	103	2	101
106	24	PMI (2014). Personal Communication	Mali	CDC_Bottle_Assay	An_gambiae_sl	Acetone	Deltamethrin	12.51.5µg/ml	Sequential	47	99	20	104
107	24	PMI (2014). Personal Communication	Mali	CDC_Bottle_Assay	An_gambiae_sl	Acetone	Deltamethrin	12.51.5µg/ml	Sequential	42	100	26	104
108	24	PMI (2014). Personal Communication	Mali	CDC_Bottle_Assay	An_gambiae_sl	Acetone	Deltamethrin	12.51.5µg/ml	Sequential	77	103	38	99
109	24	PMI (2014). Personal Communication	Mali	CDC_Bottle_Assay	An_gambiae_sl	Acetone	Deltamethrin	12.51.5µg/ml	Sequential	14	104	11	104
110	24	PMI (2014). Personal Communication	Mali	CDC_Bottle_Assay	An_gambiae_sl	Acetone	Deltamethrin	12.51.5µg/ml	Sequential	62	101	23	104
111	24	PMI (2014). Personal Communication	Mali	CDC_Bottle_Assay	An_gambiae_sl	Acetone	Deltamethrin	12.51.5µg/ml	Sequential	58	102	42	102
112	25	30	Burkina_Faso	WHO_Bioassays	An_gambiae_sl	No_PBO	Deltamethrin	0.0075	Sequential	44.3	158	2.45	163
113	25	30	Burkina_Faso	WHO_Bioassays	An_gambiae_sl	No_PBO	Permethrin	0.0005	Sequential	26.28	156	5.23	153
114	25	30	Burkina_Faso	WHO_Bioassays	An_gambiae_sl	No_PBO	Deltamethrin	0.0075	Sequential	63.1	84	32.94	85
115	25	30	Burkina_Faso	WHO_Bioassays	An_gambiae_sl	No_PBO	Permethrin	0.0005	Sequential	42.31	104	13.86	101
116	25	30	Burkina_Faso	WHO_Cone_Assay	An_gambiae_sl	No_PBO	Permethrin	20_g_AI/kg	Simultaneous	25.76	132	10.2	196
117	25	30	Burkina_Faso	WHO_Cone_Assay	An_gambiae_sl	No_PBO	Deltamethrin	2.1_g_AI	Simultaneous	97.83	46	61.4	114
118	25	30	Burkina_Faso	WHO_Cone_Assay	An_gambiae_sl	No_PBO	Permethrin	20_g_AI/kg	Simultaneous	14.42	215	9.66	207
119	25	30	Burkina_Faso	WHO_Cone_Assay	An_gambiae_sl	No_PBO	Deltamethrin	2.1_g_AI	Simultaneous	97.62	42	14.49	69
120	25	30	Burkina_Faso	WHO_Cone_Assay	An_gambiae_ss	No_PBO	Permethrin	20_g_AI/kg	Simultaneous	95.24	189	90.4	198
121	25	30	Burkina_Faso	WHO_Cone_Assay	An_gambiae_ss	No_PBO	Deltamethrin	2.1_g_AI	Simultaneous	100	47	100	136
122	26	63	Nigeria	WHO_Bioassays	An_gambiae_ss	No_PBO	Permethrin	0.0075	Sequential	94.8	115	65.7	108
123	26	63	Nigeria	WHO_Bioassays	An_gambiae_ss	No_PBO	Permethrin	0.0075	Sequential	91.7	108	70	120
124	26	63	Nigeria	WHO_Bioassays	An_gambiae_ss	No_PBO	Permethrin	0.0075	Sequential	88.4	112	71.8	110
125	26	63	Nigeria	WHO_Bioassays	An_gambiae_ss	No_PBO	Permethrin	0.0075	Sequential	87.5	120	76.2	122
126	26	63	Nigeria	WHO_Bioassays	An_gambiae_ss	No_PBO	Permethrin	0.0075	Sequential	89.5	114	78.1	114
127	26	63	Nigeria	WHO_Bioassays	An_gambiae_ss	No_PBO	Permethrin	0.0075	Sequential	92.4	118	75	116
128	26	63	Nigeria	WHO_Bioassays	An_gambiae_ss	No_PBO	Permethrin	0.0075	Sequential	76.7	116	72.3	112
129	26	63	Nigeria	WHO_Bioassays	An_gambiae_ss	No_PBO	Permethrin	0.0075	Sequential	70.5	112	65.2	118
130	26	63	Nigeria	WHO_Bioassays	An_gambiae_ss	No_PBO	Permethrin	0.0075	Sequential	81.7	115	79.1	190
131	26	63	Nigeria	WHO_Bioassays	An_gambiae_ss	No_PBO	Deltamethrin	0.0005	Sequential	79.2	115	77.5	120
132	26	63	Nigeria	WHO_Bioassays	An_gambiae_ss	No_PBO	Permethrin	0.0075	Sequential	83.1	118	81.9	116
133	26	63	Nigeria	WHO_Bioassays	An_gambiae_ss	No_PBO	Permethrin	0.0075	Sequential	83	112	82.2	118
134	27	Koudou & Malone (2015) Personal Communication	Côte_d'Ivoire	WHO_Cone_Assay	An_gambiae_ss	No_PBO	Deltamethrin	2.8_g	Simultaneous	100	20	95	40
135	27	Koudou & Malone (2015) Personal Communication	Côte_d'Ivoire	WHO_Cone_Assay	An_gambiae_ss	No_PBO	Deltamethrin	2.8_g	Simultaneous	100	19	97	38
136	28	64	Nigeria	WHO_Bioassays	An_gambiae_ss	No_PBO	Permethrin	0.0075	Sequential	88.8	120	75.7	140
137	28	64	Nigeria	WHO_Bioassays	An_gambiae_ss	No_PBO	Deltamethrin	0.0005	Sequential	94.5	120	79.5	132
138	29	70	Mozambique	WHO_Cone_Assay	An_funestus	NA	Deltamethrin	NA	NA	85.5	100	60.48	360
139	29	70	Mozambique	WHO_Cone_Assay	An_funestus	NA	Deltamethrin	NA	NA	90.16	600	81.94	360
140	29	70	Mozambique	WHO_Cone_Assay	An_gambiae_sl	NA	Deltamethrin	NA	NA	98.92	600	89.65	360
141	30	71	Malawi	WHO_Cone_Assay	An_funestus	NA	Permethrin	NA	NA	67	2	2	50
142	31	72	Nigeria	WHO_Cone_Assay	An_gambiae_ss	NA	Deltamethrin	NA	NA	100	25	100	25
143	32	73	Ethiopia	WHO_Cone_Assay	An_arabiensis	NA	Deltamethrin	NA	NA	100	300	55	180
144	32	73	Ethiopia	WHO_Cone_Assay	An_arabiensis	NA	Deltamethrin	NA	NA	100	300	47.4	180
145	32	73	Ethiopia	WHO_Cone_Assay	An_arabiensis	NA	Deltamethrin	NA	NA	100	300	77.8	180
146	32	73	Ethiopia	WHO_Cone_Assay	An_arabiensis	NA	Deltamethrin	NA	NA	100	300	64.4	180
