# Supplementary figures and images for: The impact of pyrethroid resistance on the efficacy and effectiveness of bednets for malaria control in Africa
Source: eLife journal article supplement (doi:10.7554/elife.16090), 2016-08-22

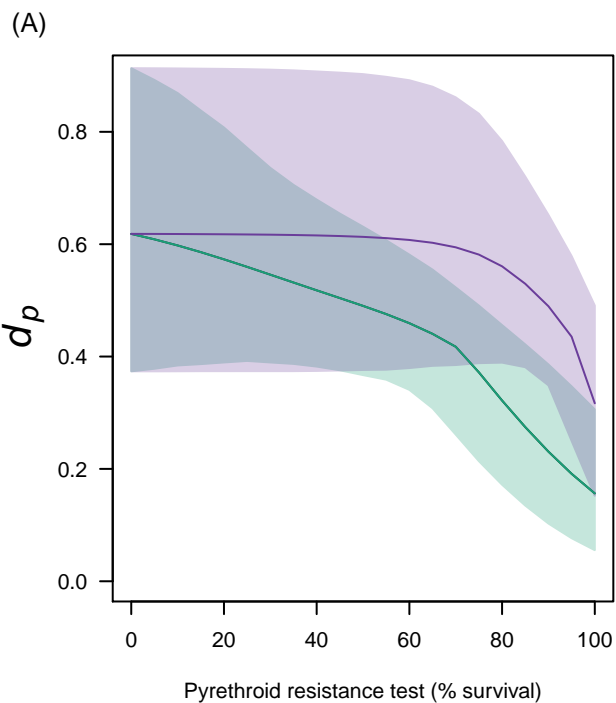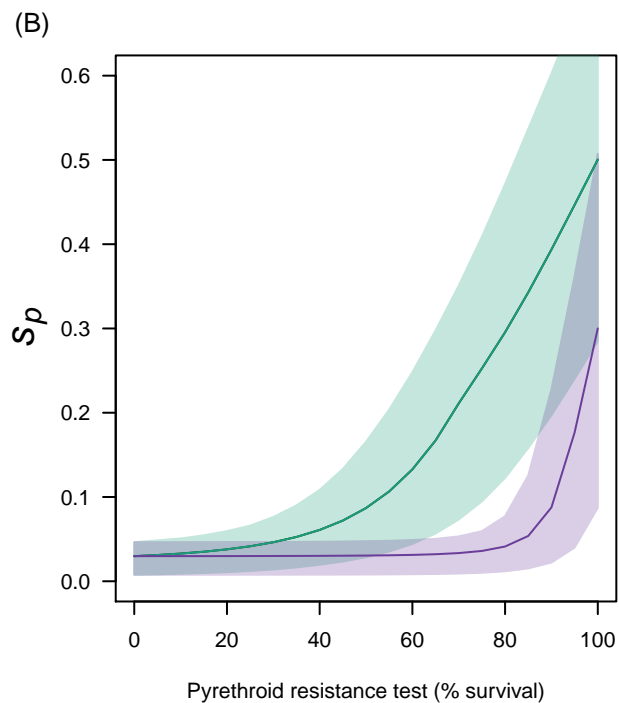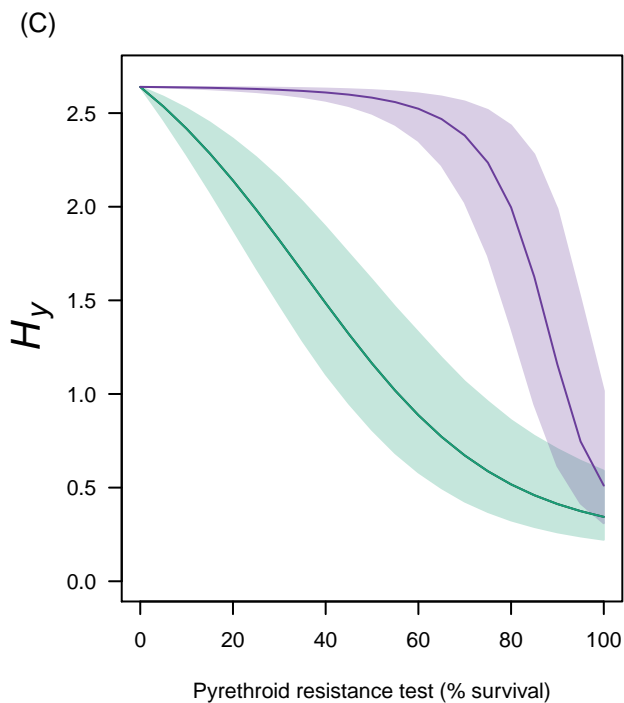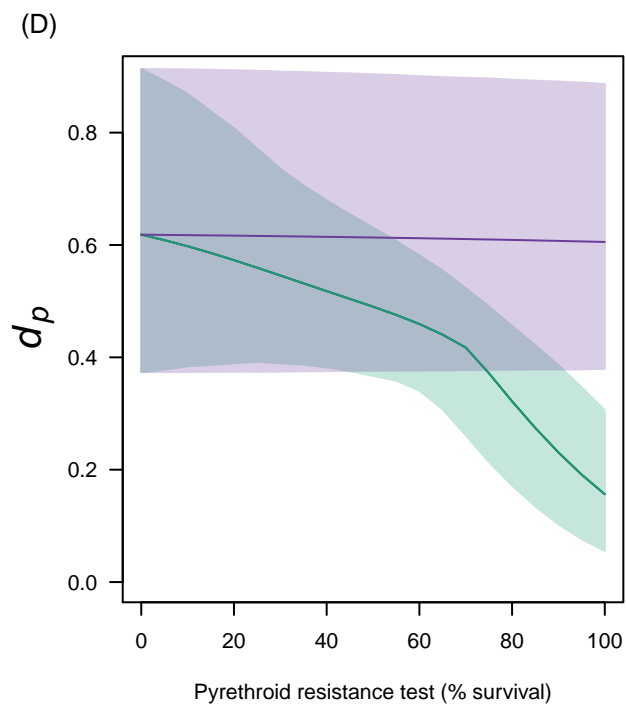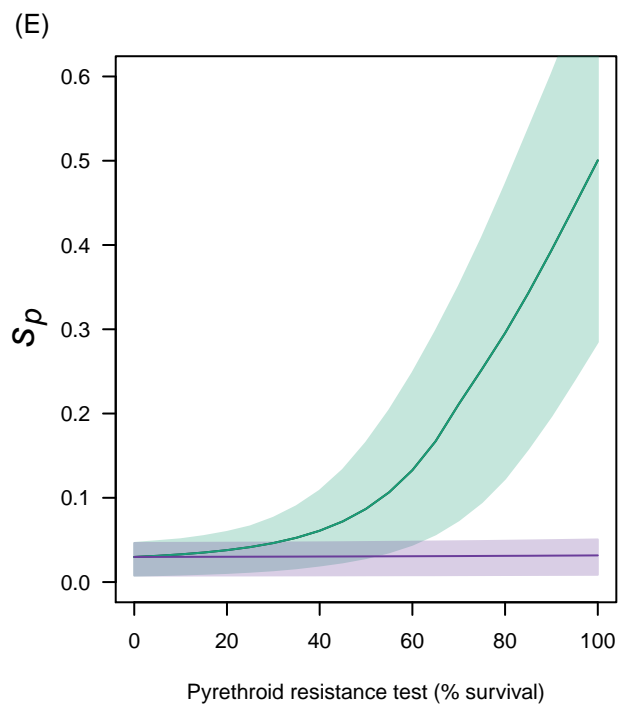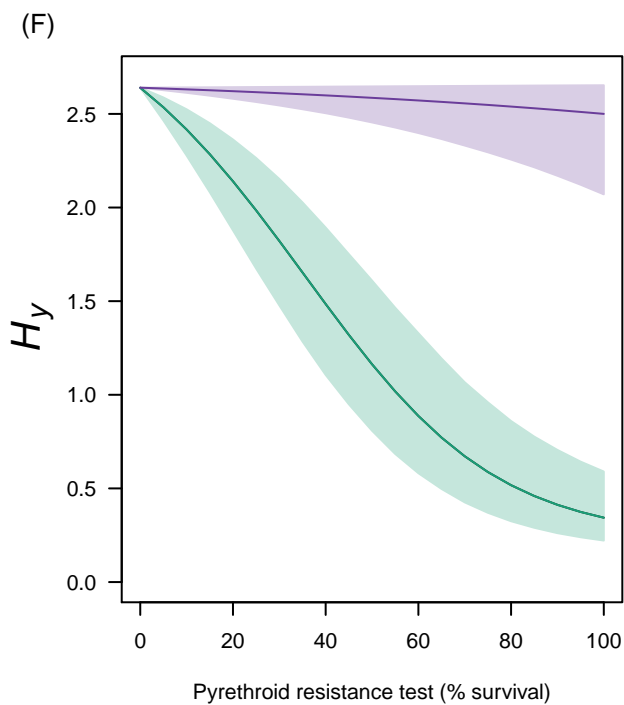

Supplement: supp [file elife-16090-supp-v1.zip]

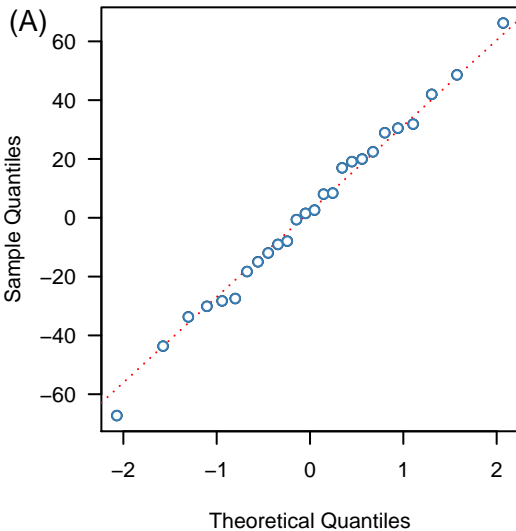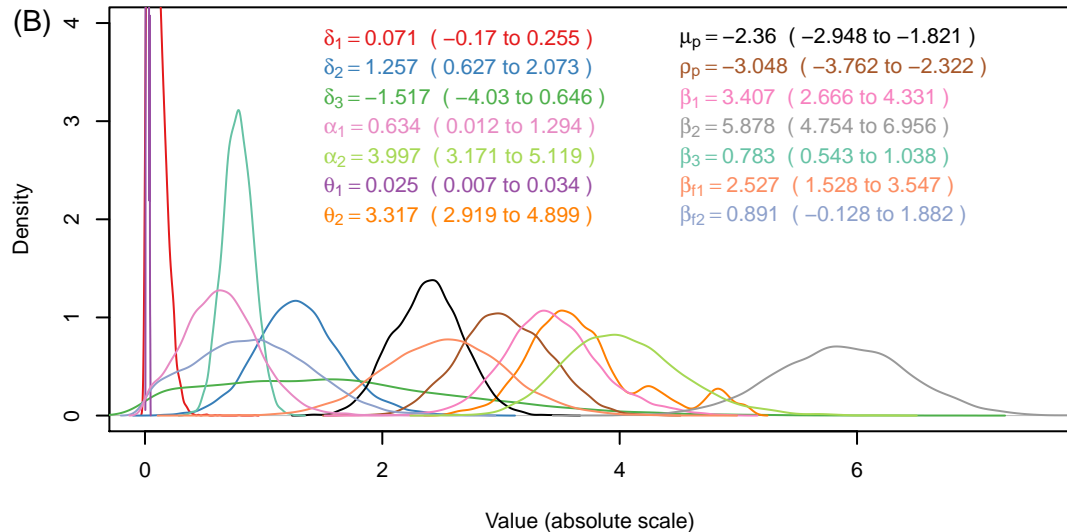

Supplement: supp [file elife-16090-supp-v1.zip]

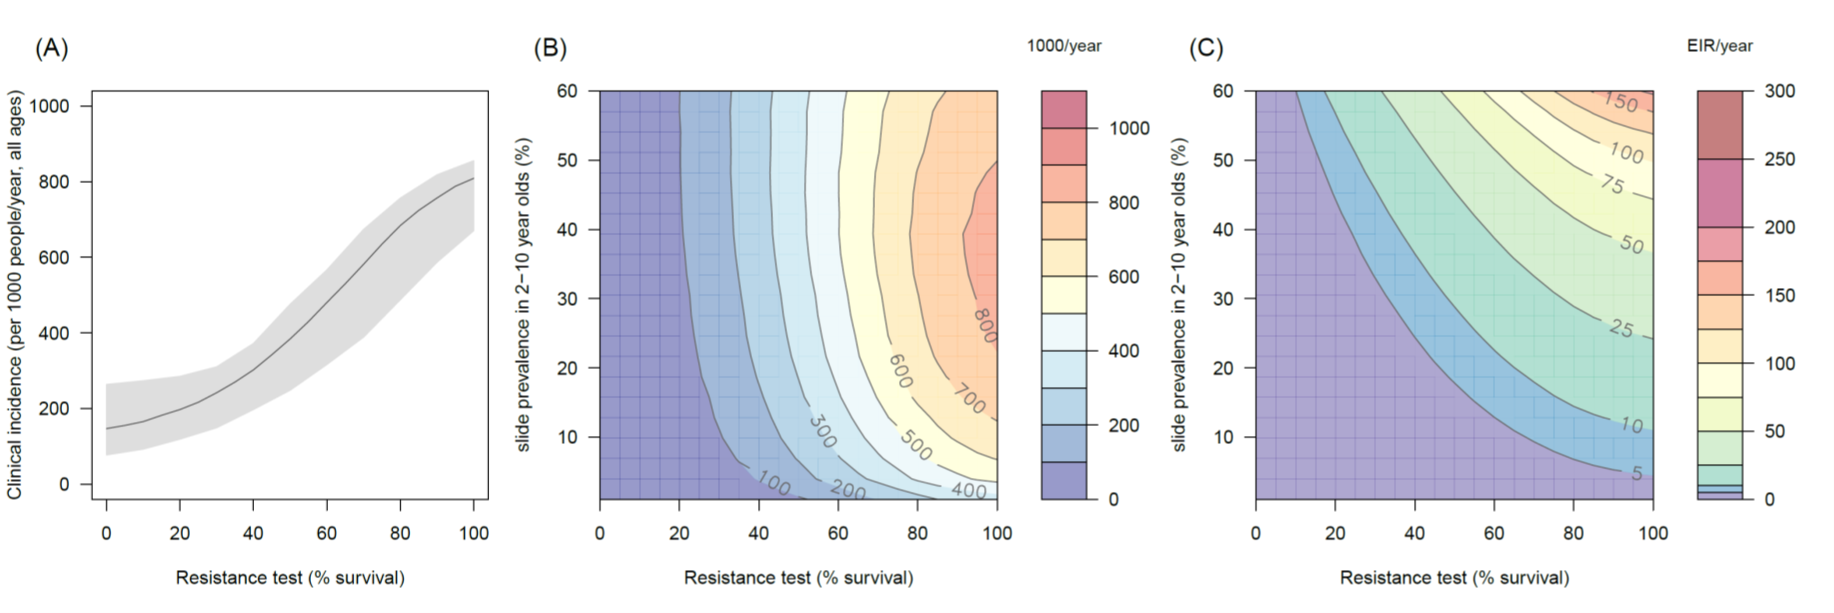

Supplement: supp [file elife-16090-supp-v1.zip › elife_poa_e16090_Figure_4_figure_supplement_2.tif]

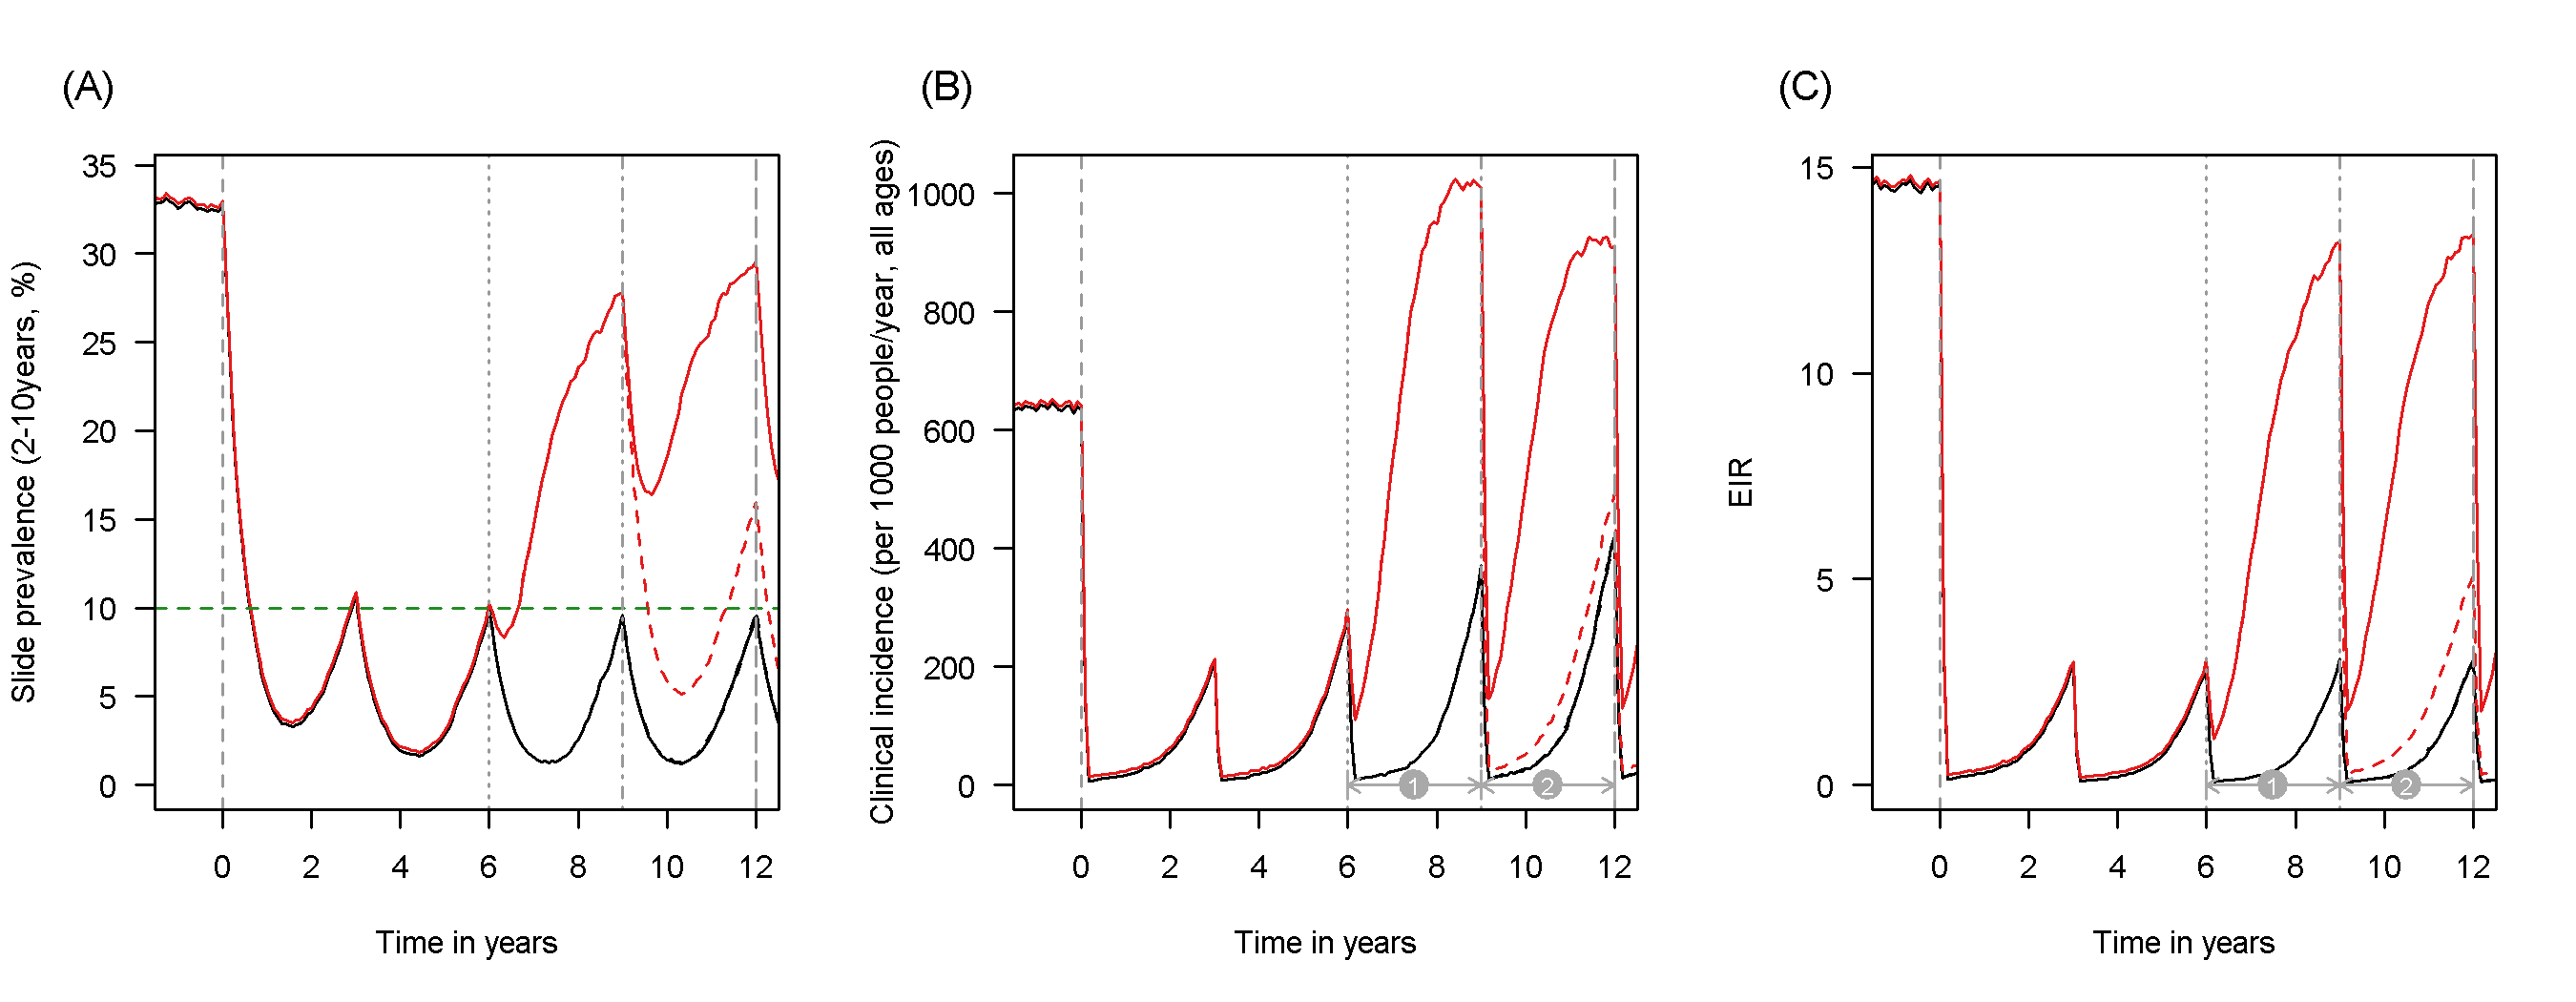

Supplement: supp [file elife-16090-supp-v1.zip › elife_poa_e16090_Figure_1_figure_supplement_2.tif]

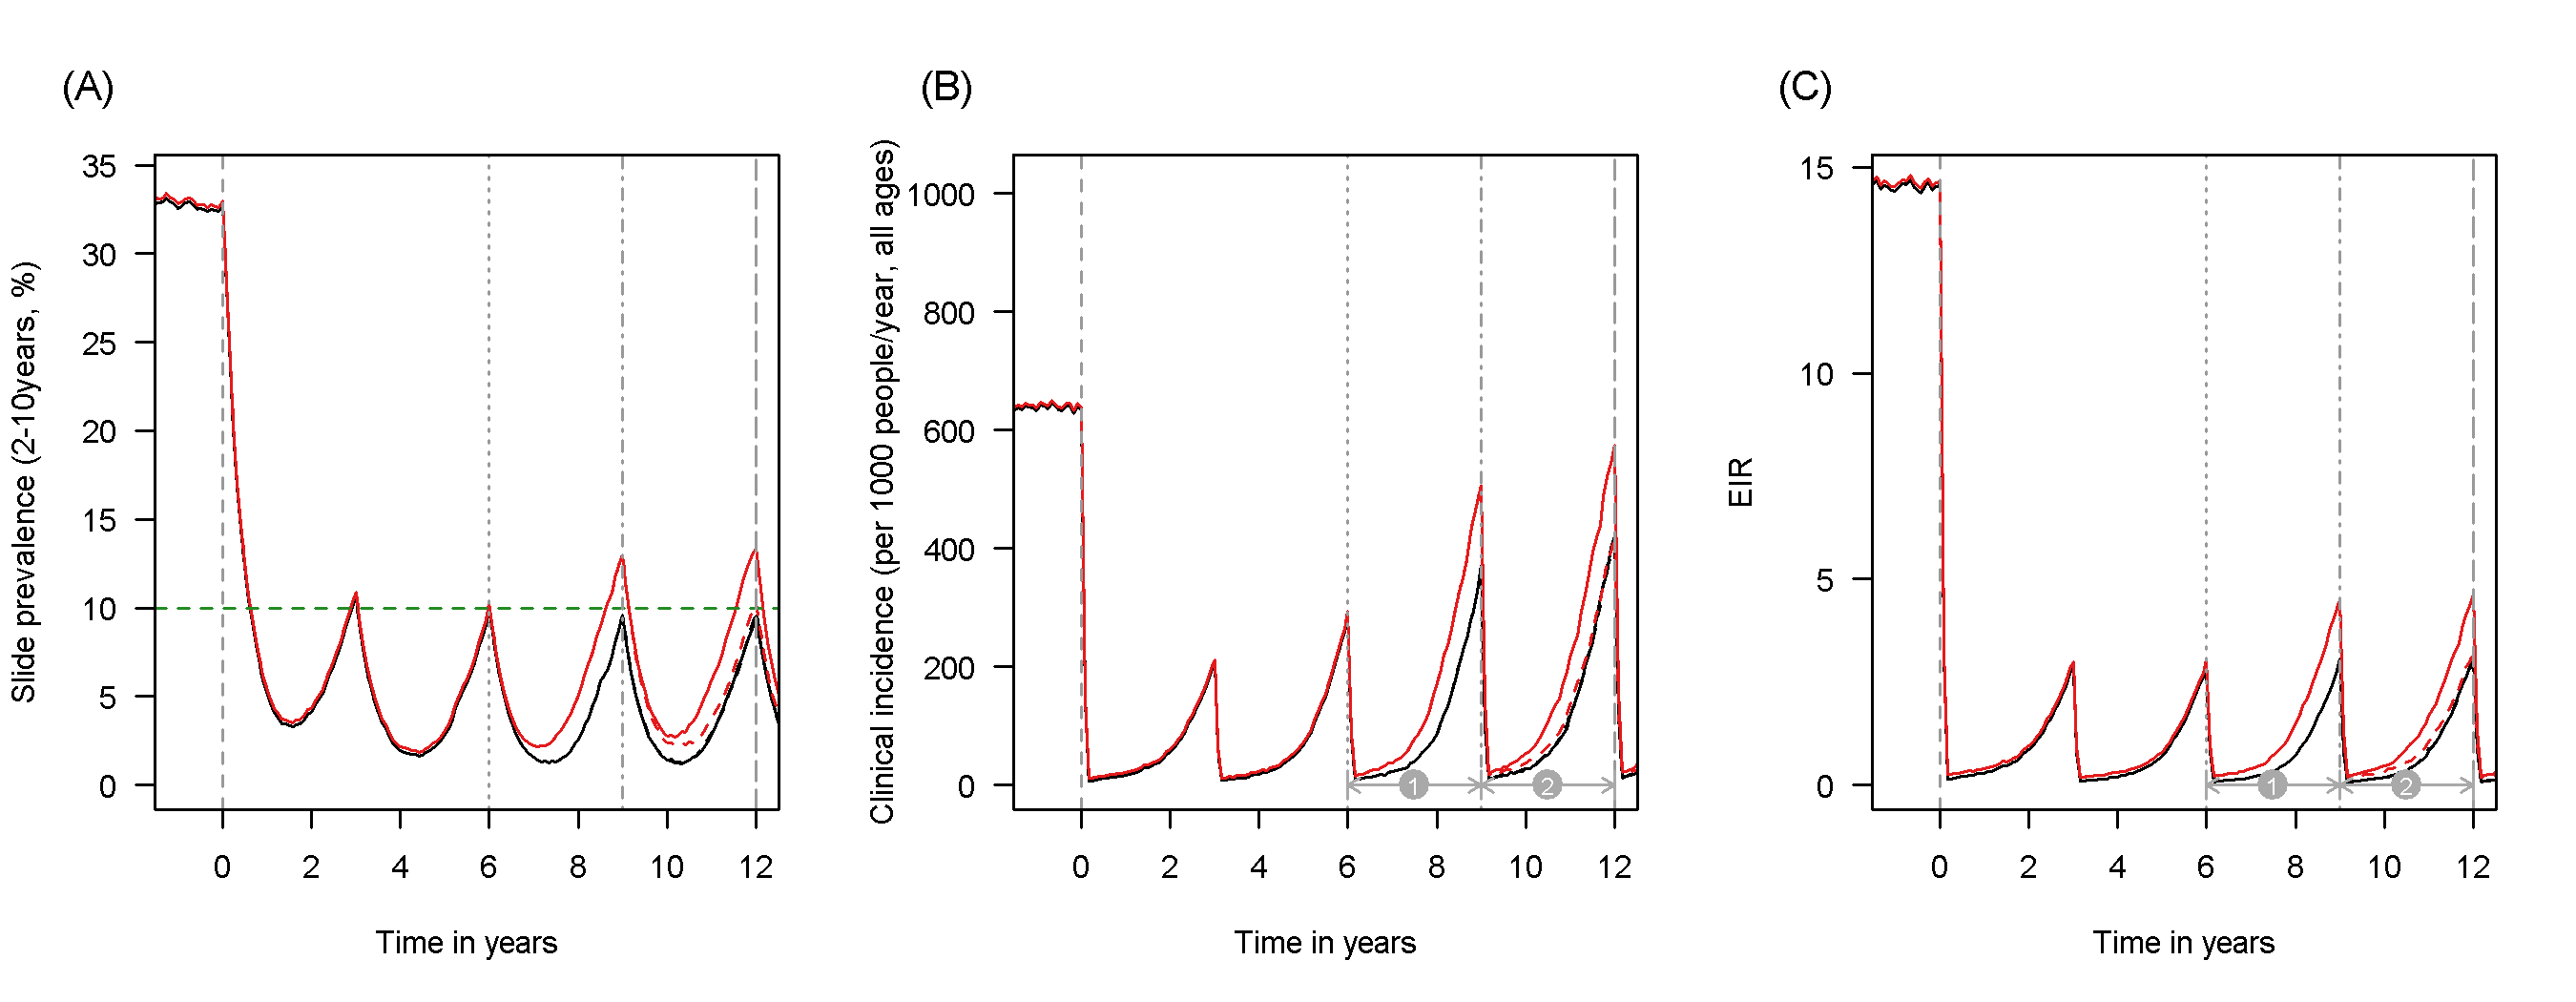

Supplement: supp [file elife-16090-supp-v1.zip › elife_poa_e16090_Figure_1_figure_supplement_1.tif]

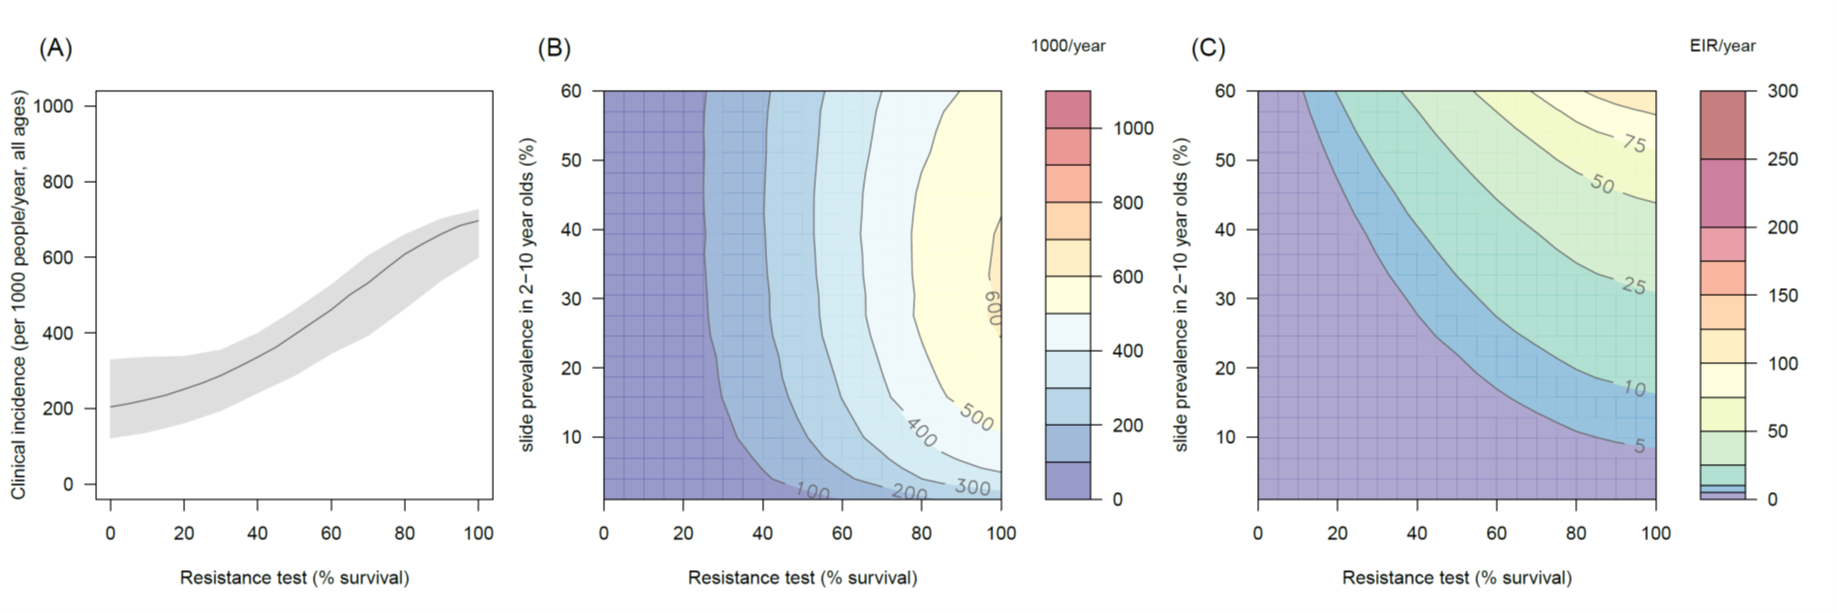

Supplement: supp [file elife-16090-supp-v1.zip › elife_poa_e16090_Figure_4_figure_supplement_1.tif]

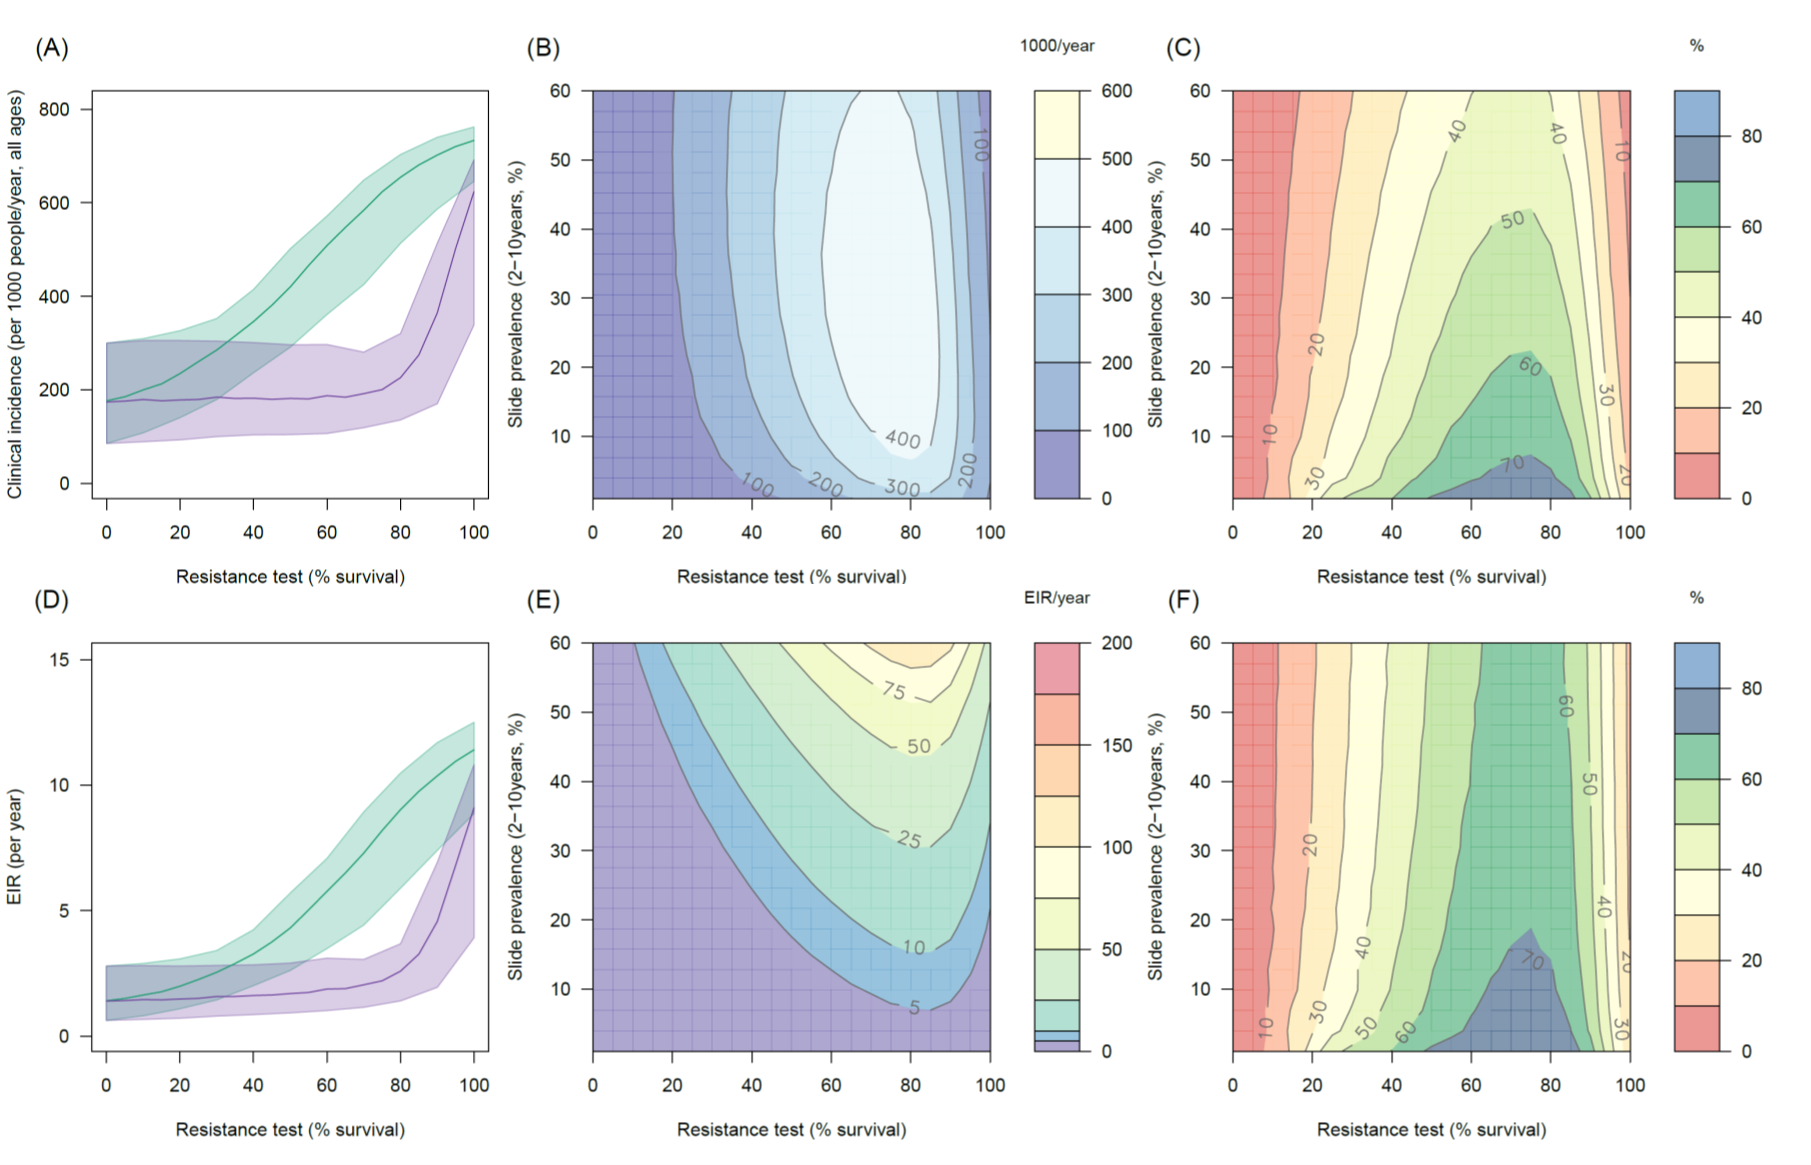

Supplement: supp [file elife-16090-supp-v1.zip › elife_poa_e16090_Figure_5_figure_supplement_2.tif]

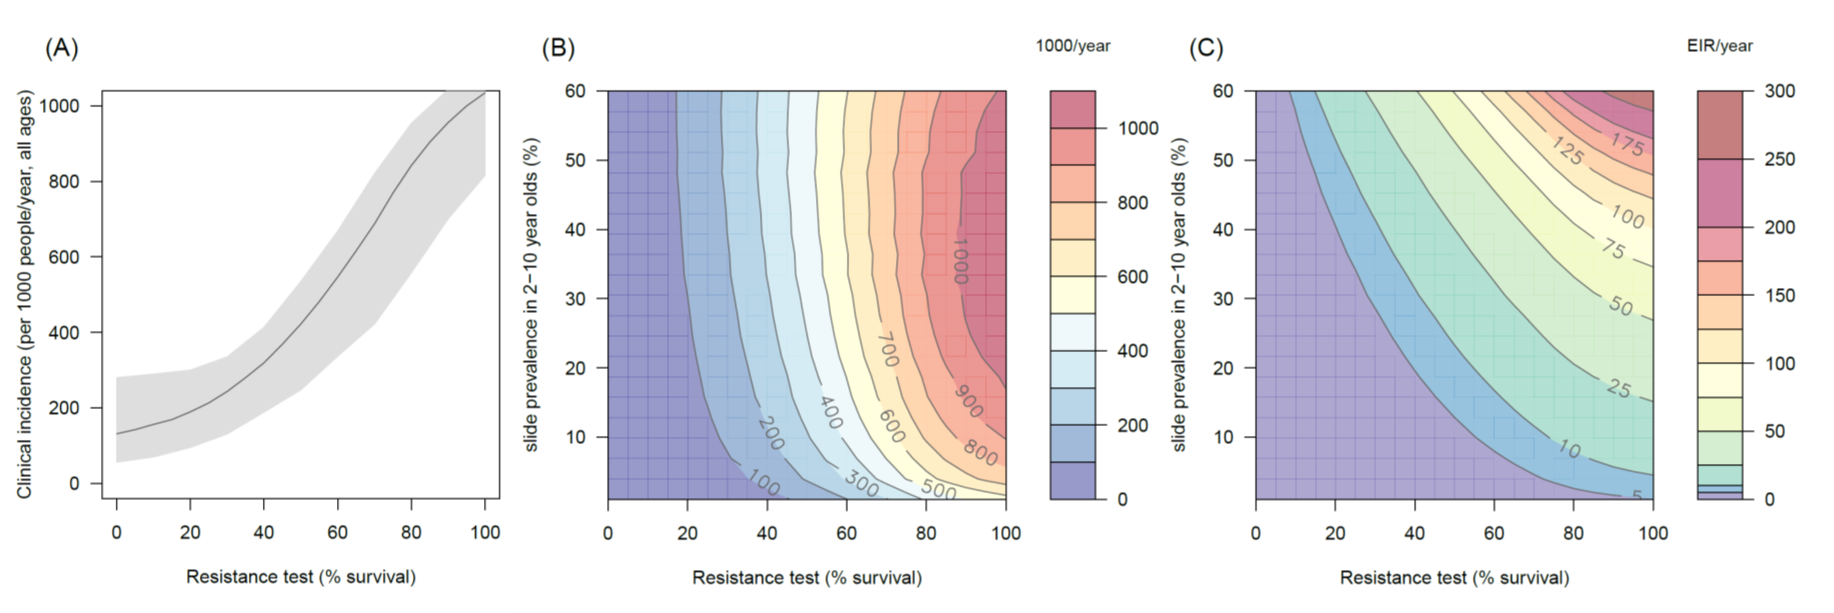

Supplement: supp [file elife-16090-supp-v1.zip › elife_poa_e16090_Figure_4_figure_supplement_3.tif]

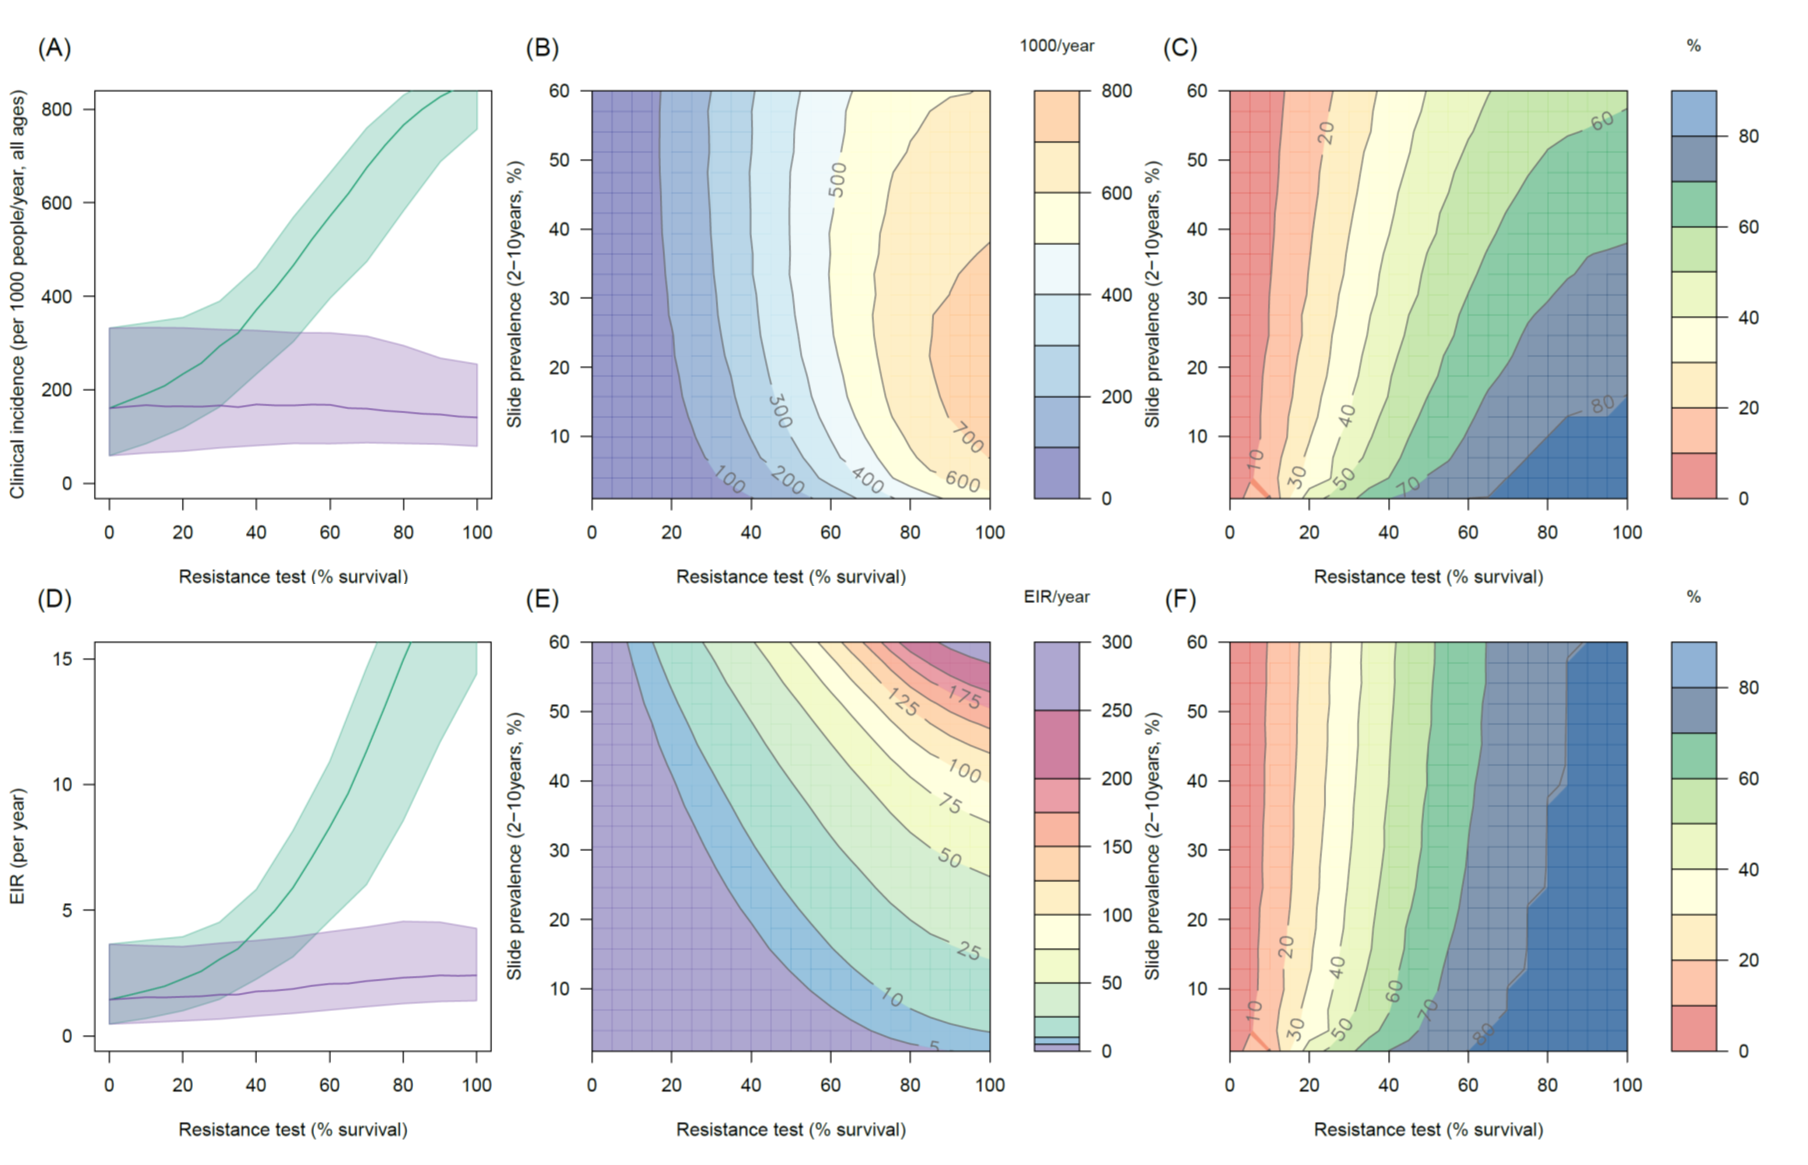

Supplement: supp [file elife-16090-supp-v1.zip › elife_poa_e16090_Figure_5_figure_supplement_3.tif]

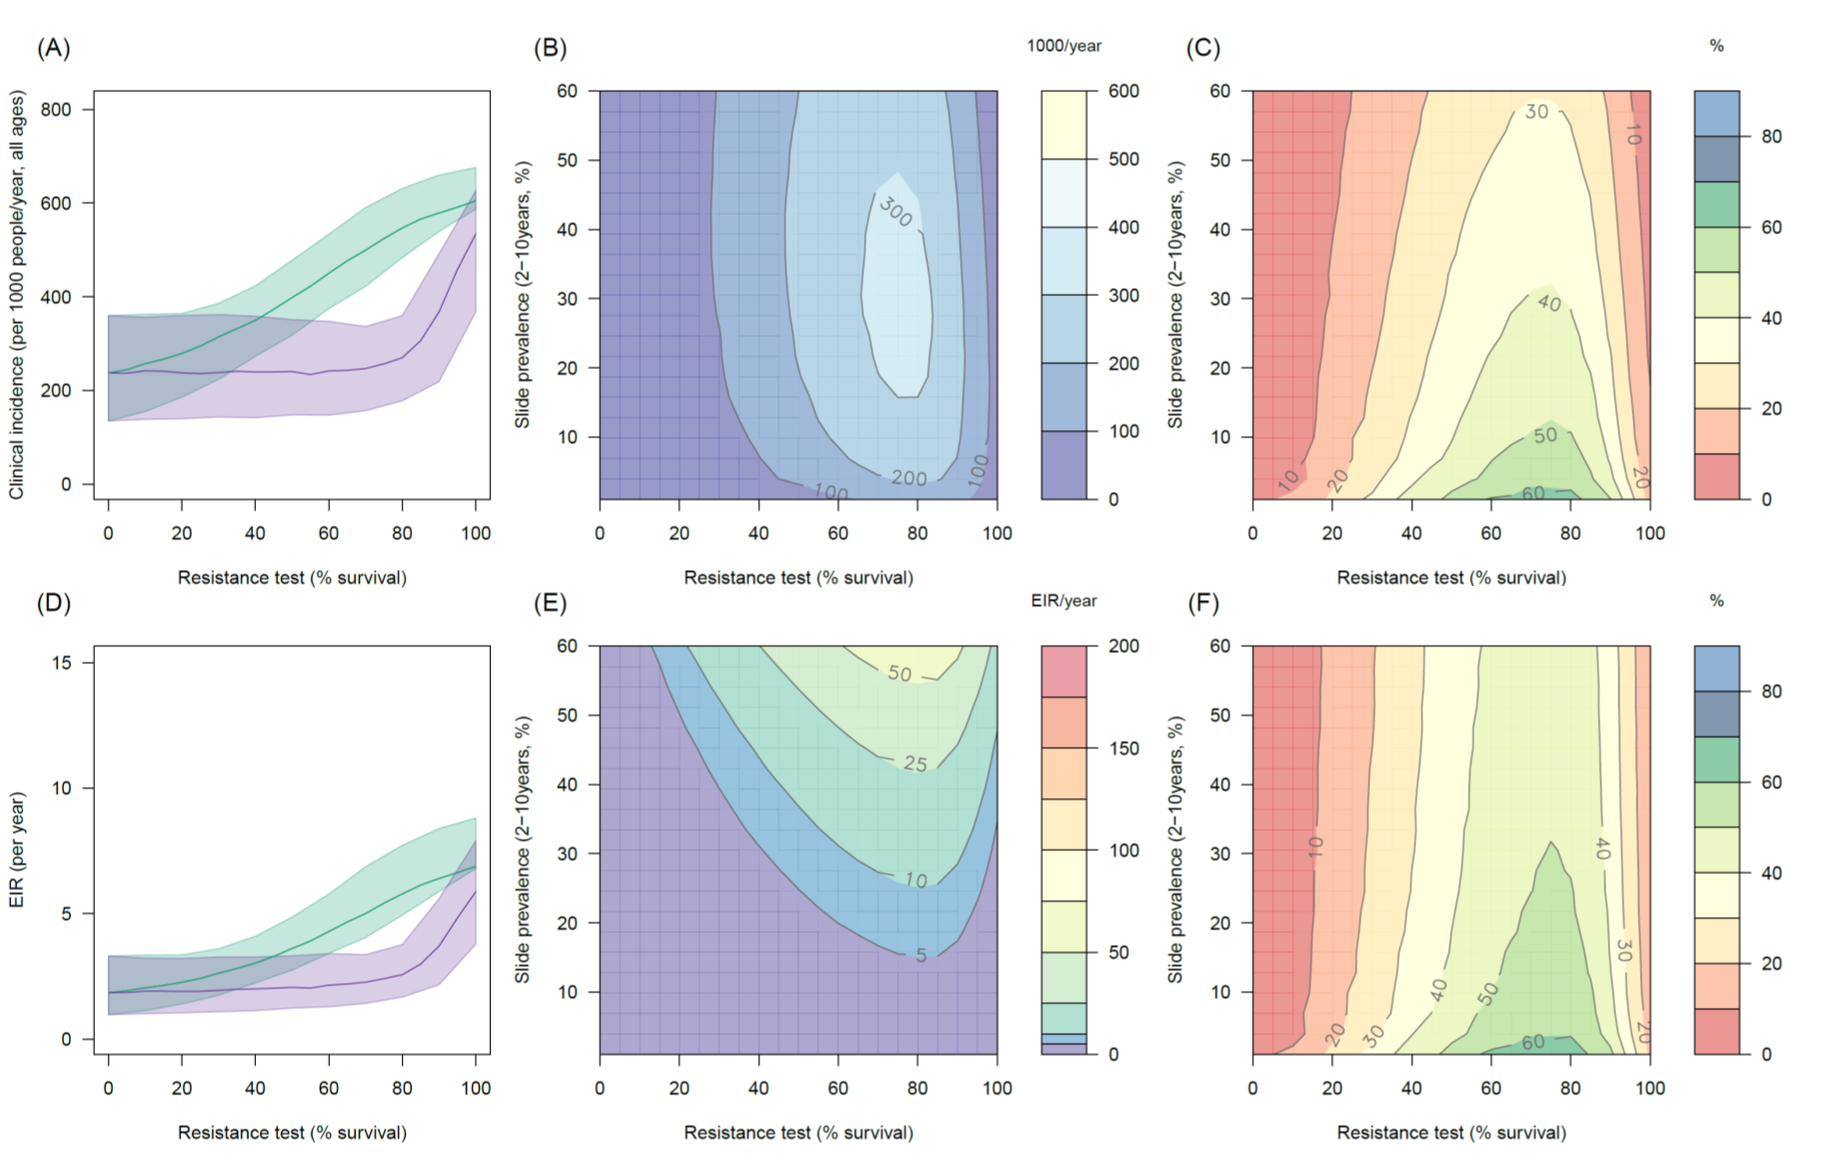

Supplement: supp [file elife-16090-supp-v1.zip › elife_poa_e16090_Figure_5_figure_supplement_1.tif]

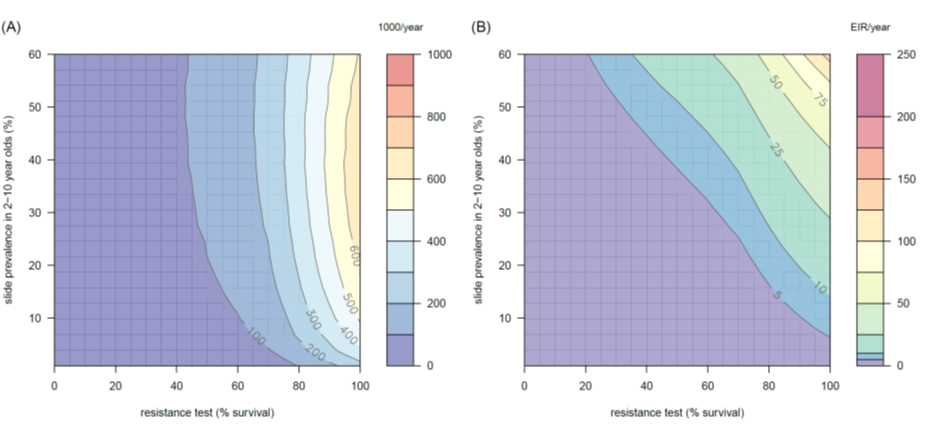

Supplement: supp [file elife-16090-supp-v1.zip › elife_poa_e16090_Figure_4_figure_supplement_4.tif]
